# Supplementary material
Source: PubMed Central journal article supplement (PMC1502291)

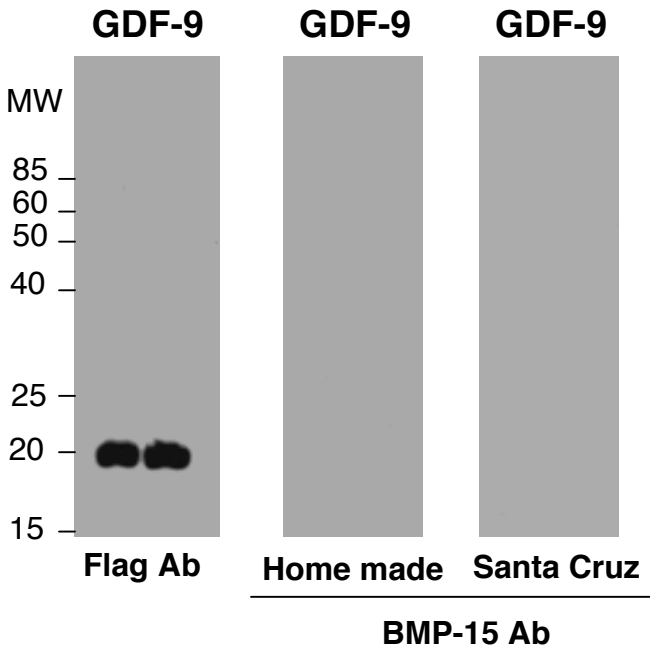

Supplement: pnas_0600507103_1.pdf [file pnas_0600507103_1.pdf]
